# Supplementary figures and images for: The Relationship between p-tau217, p-tau231, and p-tau205 in the Human Brain Is Affected by the Cellular Environment and Alzheimer’s Disease Pathology
Source: MDPI journal article supplement (doi:10.3390/cells13040331), 2024-02-11

Cohort II

ITG

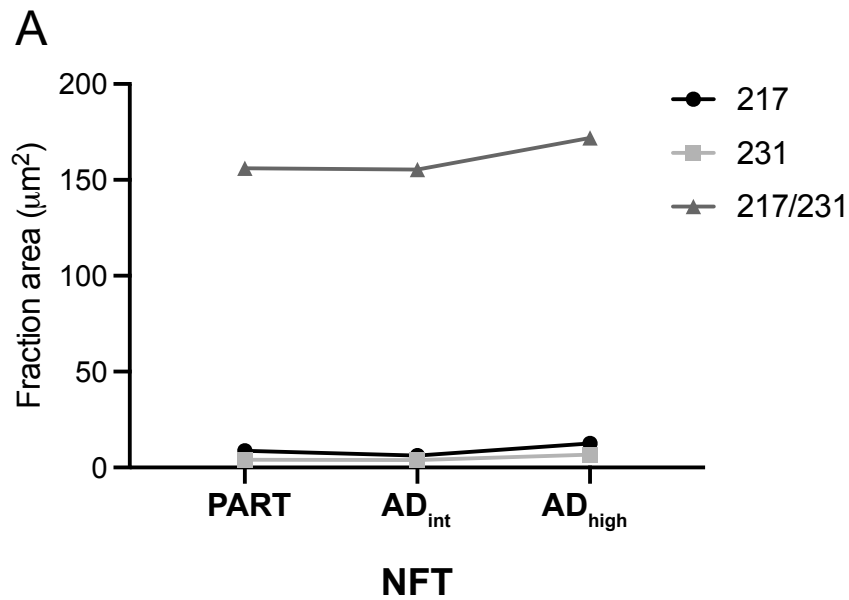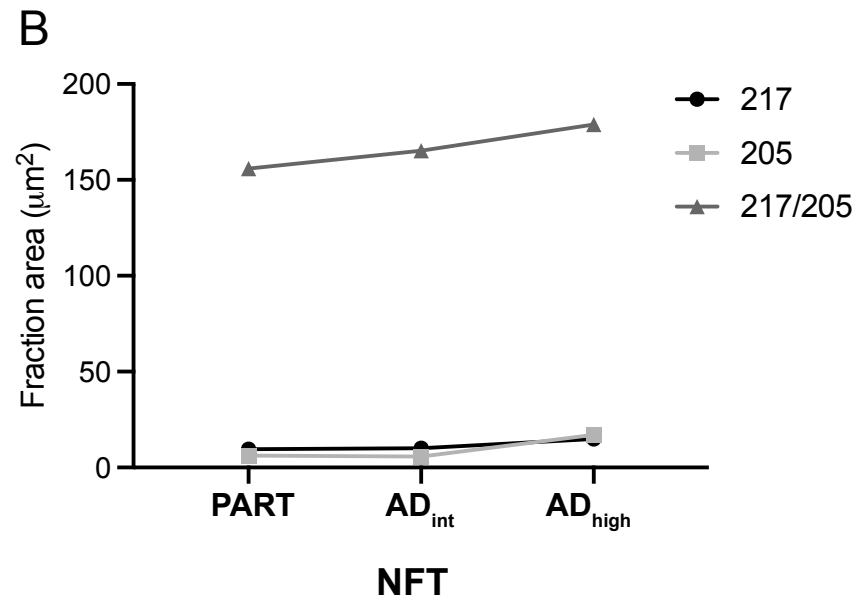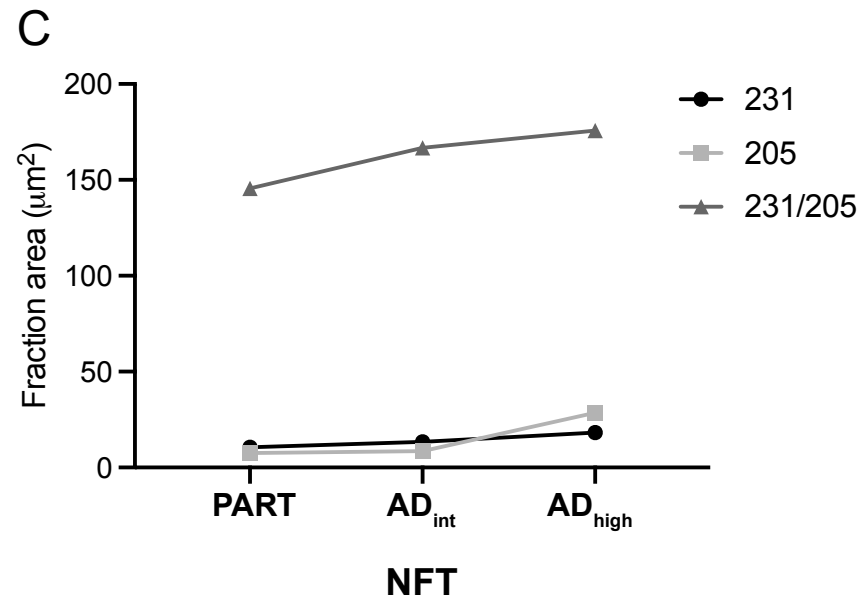

Supplement: s1 [file s1]
